# Supplementary material for: HIV Integration Targeting: A Pathway Involving Transportin-3 and the Nuclear Pore Protein RanBP2
Source: PubMed Central journal article supplement (PMC3053352; doi:10.1371/journal.ppat.1001313), 2011-03-10
Supplement: ppat.1001313.s009.pdf [file ppat.1001313.s009.pdf]

**Supplementary Table S1. Integration site data sets used in this study**

| siRNA Target         | siRNA Number                    | Virus*       | Target Cell Type | Number of Unique integration sites | References                                        | Figures            |
|----------------------|---------------------------------|--------------|------------------|------------------------------------|---------------------------------------------------|--------------------|
| Mock                 |                                 | HIV/high MOI | 293T             | 270                                | this work                                         | 1d, 2, 5, 6        |
| Mock                 |                                 | HIV          | 293T             | 43                                 | this work                                         | 1d, 2, 5           |
| Luciferase (GL2)     |                                 | HIV          | 293T             | 4296                               | this work                                         | 1c, 1d, 2, 5, 6, 8 |
| ANAPC2               | 5                               | HIV/high MOI | 293T             | 295                                | this work                                         | 5, 6               |
| ANAPC2               | 5                               | HIV          | 293T             | 316                                | this work                                         | 5, 6               |
| ANAPC2               | 6                               | HIV/high MOI | 293T             | 120                                | this work                                         | 5                  |
| ANAPC2               | 8                               | HIV/high MOI | 293T             | 197                                | this work                                         | 5, 6               |
| ANAPC2               | 8                               | HIV          | 293T             | 107                                | this work                                         | 5                  |
| IK                   | 9                               | HIV/high MOI | 293T             | 641                                | this work                                         | 5, 6               |
| IK                   | 9                               | HIV          | 293T             | 376                                | this work                                         | 5, 6               |
| LEDGF/PSIP1/p75      | shRNA                           | HIV/high MOI | 293T             | 462                                | this work, cells described in Ciuffi et al., 2005 | 5, 6               |
| MAP4                 | 4                               | HIV/high MOI | 293T             | 444                                | this work                                         | 5, 6               |
| MAP4                 | 4                               | HIV          | 293T             | 38                                 | this work                                         | 5                  |
| MAP4                 | 9                               | HIV/high MOI | 293T             | 419                                | this work                                         | 5, 6               |
| MAP4                 | 9                               | HIV          | 293T             | 641                                | this work                                         | 5, 6               |
| MAP4                 | 3                               | HIV/high MOI | 293T             | 3696                               | this work                                         | 5, 6               |
| MAP4                 | 4                               | HIV/high MOI | 293T             | 3394                               | this work                                         | 5, 6               |
| NUP98                | 3                               | HIV/high MOI | 293T             | 128                                | this work                                         | 5                  |
| NUP98                | 3                               | HIV          | 293T             | 94                                 | this work                                         | 5                  |
| NUP98                | 5                               | HIV/high MOI | 293T             | 171                                | this work                                         | 5                  |
| NUP98                | 5                               | HIV          | 293T             | 493                                | this work                                         | 5, 6               |
| NUP98                | 7                               | HIV/high MOI | 293T             | 125                                | this work                                         | 5                  |
| NUP98                | 7                               | HIV          | 293T             | 75                                 | this work                                         | 5                  |
| NUP98                | 8                               | HIV/high MOI | 293T             | 84                                 | this work                                         | 5                  |
| NUP98                | 8                               | HIV          | 293T             | 88                                 | this work                                         | 5                  |
| RANBP2               | 6                               | HIV/high MOI | 293T             | 458                                | this work                                         | 5, 6               |
| RANBP2               | 6                               | HIV          | 293T             | 344                                | this work                                         | 1c, 1d, 2, 5, 6, 8 |
| RANBP2               | pool (2.4.5.6)                  | HIV/high MOI | 293T             | 470                                | this work                                         | 5, 6               |
| RANBP2               | pool (2.4.5.6)                  | HIV          | 293T             | 363                                | this work                                         | 1d, 2, 5, 6        |
| SNW1                 | 5                               | HIV/high MOI | 293T             | 153                                | this work                                         | 5                  |
| SNW1                 | 5                               | HIV          | 293T             | 527                                | this work                                         | 5, 6               |
| TNPO3                | 1                               | HIV/high MOI | 293T             | 75                                 | this work                                         | 1d, 5              |
| TNPO3                | 1                               | HIV          | 293T             | 51                                 | this work                                         | 1d, 2, 5           |
| TNPO3                | 2                               | HIV/high MOI | 293T             | 165                                | this work                                         | 5                  |
| TNPO3                | 2                               | HIV          | 293T             | 510                                | this work                                         | 2, 5, 6            |
| TNPO3                | 4                               | HIV/high MOI | 293T             | 171                                | this work                                         | 5                  |
| TNPO3                | 4                               | HIV          | 293T             | 260                                | this work                                         | 1c, 1d, 2, 5, 6, 8 |
| TNPO3                | 5                               | HIV/high MOI | 293T             | 600                                | this work                                         | 5, 6               |
| TNPO3                | 5                               | HIV          | 293T             | 297                                | this work                                         | 1d, 2, 5, 6        |
| TNPO3                | pool (1,2,4,5)                  | HIV/high MOI | 293T             | 186                                | this work                                         | 5                  |
| TNPO3                | pool (1,2,4,5)                  | HIV          | 293T             | 216                                | this work                                         | 1d, 2, 5, 6        |
| WDHD1                | 4                               | HIV/high MOI | 293T             | 240                                | this work                                         | 5, 6               |
| WDHD1                | 4                               | HIV          | 293T             | 7                                  | this work                                         | 5                  |
| WDR46                | 1                               | HIV/high MOI | 293T             | 178                                | this work                                         | 5                  |
| WDR46                | 1                               | HIV          | 293T             | 220                                | this work                                         | 5, 6               |
| WDR46                | pool (1,2,C6orf11_2, C6orf11_4) | HIV/high MOI | 293T             | 260                                | this work                                         | 5, 6               |
| WDR46                | pool (1,2,C6orf11_2, C6orf11_4) | HIV          | 293T             | 292                                | this work                                         | 5, 6               |
| PRPF38A              | 2                               | HIV          | 293T             | 1577                               | this work                                         | 5, 6               |
| PRPF38A              | 3                               | HIV          | 293T             | 705                                | this work                                         | 5, 6               |
| GL2+Empty Vector     |                                 | HIV          | 293T             | 1226                               | this work                                         | 3, S5              |
| TNPO3+Rescue         | 4                               | HIV          | 293T             | 1492                               | this work                                         | 3, S5              |
| TNPO3+Empty Vector   | 4                               | HIV          | 293T             | 314                                | this work                                         | 3, S5              |
| GL2+Empty Vector     |                                 | MLV          | 293T             | 616                                | this work                                         | 4, 8               |
| TNPO3+Rescue         | 4                               | MLV          | 293T             | 354                                | this work                                         | 4                  |
| TNPO3+Empty Vector   | 4                               | MLV          | 293T             | 376                                | this work                                         | 4, 8               |
| SNW1+Empty Vector    | 5                               | MLV          | 293T             | 90                                 | this work                                         | S6                 |
| ANAPC2 +Empty Vector | 5                               | MLV          | 293T             | 79                                 | this work                                         | S6                 |
| ANAPC2 +Empty Vector | 6                               | MLV          | 293T             | 32                                 | this work                                         | S6                 |
| ANAPC2 +Empty Vector | 8                               | MLV          | 293T             | 251                                | this work                                         | S6                 |
| None                 |                                 | HIVPuro      | HeLa             | 485                                | Lewinski et al. PLOS Pathog 2006                  | 7                  |
| None                 |                                 | HIVmGag      | HeLa             | 452                                | Lewinski et al. PLOS Pathog 2006                  | 7                  |

\* Infections were performed using enough HIV/MLV vector stock to infect 30-60% of untreated cells except where marked as "highMOI" where 90-100% of untreated cells were infected
