# Supplementary material for: HIV Integration Targeting: A Pathway Involving Transportin-3 and the Nuclear Pore Protein RanBP2
Source: PubMed Central journal article supplement (PMC3053352; doi:10.1371/journal.ppat.1001313), 2011-03-10
Supplement: ppat.1001313.s010.pdf [file ppat.1001313.s010.pdf]

Supplementary Table S2 - DNA and RNA oligonucleotides used in this study

Primer Sequences

| Oligo          | Sequence                                                       | Description                                                                             |
|----------------|----------------------------------------------------------------|-----------------------------------------------------------------------------------------|
| Mse linker+    | GTAATACGACTCACTATAGGGCTCCGCTTAAGGGAC                           | Linker oligo plus strand                                                                |
| Mse linker-    | [Phosp]TAGTCCCTTAAGCGGAG-[AmC7-Q]                              | Linker oligo minus strand, 5'phosphate and 3' amide C7 modification                     |
| MseL1          | GTAATACGACTCACTATAGGGC                                         | Linker primer for first round PCR                                                       |
| MKL-3          | CTTAAGCCTCAATAAAGCTTGCCTTGAG                                   | HIV LTR primer for first round PCR                                                      |
| GW-3           | GCCTCCCTCGCGCCATCAGAGGGCTCCGCTTAAGGGAC                         | Linker primer for second round PCR                                                      |
| Barcoded B-HIV | GCCTTGCCAGCCCGCTCAGXXXXXXXXAGACCCTTTAGTCAGTGTGGAA<br>AATC      | HIV LTR primer for second round PCR, XXXXXXXX represents 8bp barcode for 454 sequencing |
| KR-5           | CCTCTTGCA GTTGCATCCGAC                                         | MLV LTR primer for first round PCR                                                      |
| Barcoded B-MLV | GCCTTGCCAGCCCGCTCAGXXXXXXXXTGATTGACTACCCGTCAGCGG               | MLV LTR primer for second round PCR, XXXXXXXX represents 8bp barcode for 454 sequencing |
| kr237          | gtcaccttgctgaggagcCagGTcGTgATtCCcAtTTgCagtggccattgctctac       | TNPO3 quikchange fwd siRNA_4                                                            |
| kr238          | GTAGAGGCAATGGCCCACTGCAAATGGGAATCACGACCTGGCTCCGCA<br>GCAAGGTGAC | TNPO3 quikchange rev siRNA_4                                                            |

siRNA Information and Sequences

| Target            | siRNA Number | siRNA sequence        | Product ID | Product Name                         |
|-------------------|--------------|-----------------------|------------|--------------------------------------|
| AllStarDeath      |              | Proprietary           | 1027298    | AllStars Hs Cell Death Control siRNA |
| ANAPC             | 1            | GAGAGTCTATATGCAGAGTAA | SI00101829 | Hs_ANAPC2_1                          |
|                   | 5            | AAGGTTCTTCTACCGCATCTA | SI02652951 | Hs_ANAPC2_5                          |
|                   | 6            | CTCACTGGATCGTATCTACAA | SI02653203 | Hs_ANAPC2_6                          |
|                   | 8            | ACAGGCGGTGATCTTGCTGTA | SI04439456 | Hs_ANAPC2_8                          |
| AQR               | 2            | CAGGATGGATTTAGCCGACTA | SI00299530 | Hs_AQR_2                             |
|                   | 5            | CAAGGCCTATTTAATGTCAAT | SI04168675 | Hs_AQR_5                             |
|                   | 6            | CCCTACGGTGTCCCAAATCAA | SI04217899 | Hs_AQR_6                             |
|                   | 7            | TTGCTGGTATCTCGTCATGAA | SI04366859 | Hs_AQR_7                             |
| GL2 (irrel siRNA) |              | AACGTACGCGGAATACTTCGA | 1022070    | Luciferase GL2 siRNA                 |
| IK                | 1            | AACCCGTAACAAGAAGCTTAA | SI00084336 | Hs_IK_1                              |
|                   | 3            | CAGCGAGTATATGAACAACAA | SI00084350 | Hs_IK_3                              |
|                   | 4            | CAGGCGCTTCAAGGAAACCAA | SI00084357 | Hs_IK_4                              |
|                   | 9            | AATGACATTGTCATTAGCAAG | SI00300531 | Hs_IK_9                              |
| MAP4              | 3            | CCCAGATTTCCAAATCATTAA | SI00627809 | Hs_MAP4_3                            |
|                   | 4            | AAGATTCTTATTGCACTTGTA | SI00627816 | Hs_MAP4_4                            |
|                   | 8            | CAAGGTGGGATCCCTCGATAA | SI04315731 | Hs_MAP4_8                            |
|                   | 9            | AACCCGAAAGCCTGAATCTAA | SI04337053 | Hs_MAP4_9                            |
| NUP98             | 3            | CTGGAGTTAGCACTAACATAA | SI00115332 | Hs_NUP98_3                           |
|                   | 5            | CAGTGTATTACTGCTATGAAA | SI02635115 | Hs_NUP98_5                           |
|                   | 7            | AACCCTATTGCCAAACCTATT | SI03028578 | Hs_NUP98_7                           |
|                   | 8            | CTCACTAAGGTTGGTTACTAT | SI03088491 | Hs_NUP98_8                           |
| PRPF38A           | 1            | TCCGACGGAATAGAAATTGAA | SI00395801 | Hs_FLJ14936_1                        |
|                   | 2            | CAGGCCTAGTCAGTAGCAGTA | SI04159225 | Hs_PRPF38A_2                         |
|                   | 3            | TCCACGGACATCGATAATCAA | SI04186567 | Hs_PRPF38A_3                         |
|                   | 4            | CGGCTTCAAGATGGTCGCCTA | SI04246634 | Hs_PRPF38A_4                         |
| RanBP             | 2            | CAGGTGGGAACAGGATTTAAA | SI00698250 | Hs_RANBP2_2                          |
|                   | 4            | CAGCTTGGTTCTGATGATAGA | SI00698264 | Hs_RANBP2_4                          |
|                   | 5            | AGCGCGGTGTTGGAGATATAA | SI03043901 | Hs_RANBP2_5                          |
|                   | 6            | TCGTTTCGATGTAGAATCCAA | SI03117310 | Hs_RANBP2_6                          |
| SNW1              | 2            | TCGGATGGTAGAAATGCAGAA | SI00098609 | Hs_SKIIP_2                           |
|                   | 3            | CACAGGTCTCTCCAAAGTGAA | SI00098616 | Hs_SKIIP_3                           |
|                   | 5            | AACGTCTGGCTGCTGATGGAA | SI00301812 | Hs_SKIIP_5                           |

|              |      |                        |            |              |
|--------------|------|------------------------|------------|--------------|
|              | 7    | CCCGATGAAGAAGCTATTTAAA | SI02655478 | Hs_SKIIP_7   |
| <b>TNPO3</b> | 1    | ACCGAATGTCTTAGTGAACATA | SI00100513 | Hs_TNPO3_1   |
|              | 2    | CTGGAGATCCTTACAGTGTTA  | SI00100520 | Hs_TNPO3_2   |
|              | 4    | CAAGTGGTCATCCCTATCTTA  | SI00100534 | Hs_TNPO3_4   |
|              | 5    | CTGGGAGATCATGCAGGTTGA  | SI02639721 | Hs_TNPO3_5   |
| <b>WDHD1</b> | 1    | CTGCACTTAGTCGAACTACAA  | SI00094472 | Hs_WDHD1_1   |
|              | 2    | AAGGACGAGTAAATCCCTTTA  | SI00094479 | Hs_WDHD1_2   |
|              | 4    | TGCTGTGAATTTAGCCATTAA  | SI00094493 | Hs_WDHD1_4   |
|              | 5    | CAGGTAGTATTAATGGTCTAA  | SI02638503 | Hs_WDHD1_5   |
| <b>WDR46</b> | 1    | CAGGGCCTCCTCGTAACAAGA  | SI03071383 | Hs_WDR46_1   |
|              | 2    | CAGTTTGGACCCTACAGACTA  | SI03073609 | Hs_WDR46_2   |
|              | 11-2 | TGCCCTTGATTGGGTAACAAA  | SI00077455 | Hs_C6orf11_2 |
|              | 11-4 | AAAGAAGTCTCGGATCTCTAA  | SI00077469 | Hs_C6orf11_4 |
